# Supplementary material for: Altered visual cortex excitatory/inhibitory ratio following transient congenital visual deprivation in humans
Source: eLife. 2025 May 16;13:RP98143. doi: 10.7554/eLife.98143 (PMC12084009; doi:10.7554/eLife.98143)
Supplement: Supplementary file 1. [file elife-98143-supp1.xlsx]

## Sheet: Sheet1
	1	Site		LUCID Diagnostics, Banjara Hills, Hyderabad, India
	2	Hardware
		a.	Field Strength	3 T
		b.	Manufacturer	General Electric
		c.	Model (Software Version)	Advanced MRS Package (AMRSP)
		d.	RF coils	32 channel head coil
		e.	Additional Hardware	N/A
	3	Acquisition
		a.	Pulse Sequence	MEGA-PRESS
		b.	Volume of Interest Locations	Visual cortex, Frontal cortex
		c.	Nominal VOI size	40 x 30 x 25 mm
		d.	Repetition Time, Echo Time	TR = 2000 ms, TE = 68 ms
		e.	Total number of excitations or acquisitions per spectrum	256 averages, 8 water unsuppresed averages
		f.	Additional sequence parameters (spectral width in Hz, number of spectral points,frequency offsets
			If MRSI: 2D or 3D, FOV in all directions, matrix size, acceleration factors, samplingmethod	NA
		g.	Water suppression method	CHESS
		h.	Shimming method, reference peak, and thresholds for “acceptance of shim” chosen	Automated B0 field mapping , water < 10 Hz for visual cortex and < 17 Hz for frontal cortex
		i.	Triggering or motion correction method (respiratory, peripheral, cardiac triggering,incl. device used and delays	NA
	4	Data analysis methods and outputs
		a.	Analysis software	Gannet 3.0, Tarquin, All analyses repeated with Osprey
		b.	Processing steps deviating from quoted reference or product	NA
		c.	Output measures	Water-normalized values, institutional units (GABA/Glx)/mM (NAA); Analyses repeated with Cr-normalization in Gannet 3.0
		d.	Quantification references and assumptions,fitting model assumptions	Assumptions default as in references
	5	Data Quality
		a.	Reported variables (SNR, linewidth (with reference peaks))	SNR, Linewidth (water-normalized)
		b.	Data exclusion criteria	2 subjects (1 from each group) were excluded due to data corruption at the scanner
		c.	Quality measures of postprocessing model fitting	Fit error, FWHM and SNR for GABA+,Glx and NAA, CRLB for NAA
		d.	Sample Spectrum	Figure 2 for average, Figure S8 for individual subjects for DIFF Spectra, Figure S13 for OFF Spectra
